# Supplementary material for: Effective Arterial Elastance as The Best Predictor of Mean Arterial Pressure in Patients with Sepsis or Septic Shock Receiving Fluid Expansion: A Validation Study by Regression Analysis
Source: Research Square preprint supplement (doi:10.21203/rs.3.rs-1675015/v1), 2022-05-23
Supplement: Supplementary file 1 [file b2a0ebb8d7e3abd1baa019ff.docx]

Supplement document

**Table 1** Multiple linear regression models to predict ΔMAP

| **Model** | **Variables** | **Coefficient b** | **Coefficient β** | **95% CI for b** | | **P value** | **R2** | **Adjusted R2** |
| --- | --- | --- | --- | --- | --- | --- | --- | --- |
| LB | UB |
| 1 | ΔCO | -8.169 | -0.275 | -21.220 | 4.881 | 0.207 | 0.084 | -0.003 |
| ΔEaDyn | 1.523 | 0.062 | -9.268 | 12.314 | 0.772 |
| constant | 4.234 |  | -1.458 | 9.933 | 0.137 |
| 2 | ΔCO | 5.460 | 0.513 | 3.665 | 7.254 | <0.001 | 0.633 | 0.620 |
| ΔEaeff | 17.798 | 0.813 | 14.110 | 21.486 | <0.001 |
| constant | 2.430 |  | 0.219 | 4.642 | 0.032 |
| 3 | ΔCO | 4.204 | 0.395 | 1.765 | 6.643 | 0.001 | 0.303 | 0.280 |
| ΔEaNet | 23.153 | 0.528 | 13.105 | 33.201 | 0.000 |
| constant | 3.133 |  | 0.090 | 6.175 | 0.044 |
| 4 | ΔCO | 3.924 | 0.368 | 1.603 | 6.245 | 0.001 | 0.344 | 0.322 |
| ΔRaNet | 2.778 | 0.557 | 1.692 | 3.864 | 0.000 |
| constant | 2.660 |  | -0.323 | 5.643 | 0.79 |

**Table 2** shows the collinearity diagnostic test between independent variables of each model. The Tolerance and Variance inflation factor (VIF) demonstrates a low degree of collinearity. The Tolerance very closed to 1 and the VIF less than 10 suggest a low degree of collinearity.

| **Model** | | **Collinearity Statistics** | |
| --- | --- | --- | --- |
| **Tolerance** | **VIF** |
| 1 | %CO | 0.999 | 1.001 |
| %EaDyn | 0.999 | 1.001 |
| 2 | %CO | 0.809 | 1.237 |
|  | %EaArt | 0.809 | 1.237 |
| 3 | %CO | 0.986 | 1.015 |
|  | %EaNet | 0.986 | 1.015 |
| 4 | %CO | 0.996 | 1.004 |
|  | %RaNet | 0.996 | 1.004 |
